# Supplementary material
Source: PubMed Central journal article supplement (PMC4249427)
Supplement: AAC.03607-14_zac011143414so1.pdf [file AAC.03607-14_zac011143414so1.pdf]

## **Supplemental Materials**

### **Assay Validation Methods**

**Accuracy and Precision.** Intra- and inter-assay accuracy and precision for both rifapentine (RPT) and desacetyl-rifapentine (desRPT) were determined through the analysis of quality control (QC) levels in plasma and whole blood as dried blood spots prepared at lower limit of quantification (LLOQ), low, mid and high levels. Intra-assay studies were evaluated via the analysis of 5-6 QC specimens tested within a single analytical run, which are flanked by two calibration curves. Inter-assay studies were carried out through the extraction and testing of QC samples across three independent runs. Accuracy was determined as the percent deviation (% DEV) from the target concentration, calculated by the difference between the experimental value and the target value divided by the target value and then multiplied by 100. Precision was defined as the coefficient of variation (%CV), calculated by using the standard deviation of a QC level divided by the mean observed concentration and multiplied by 100.

**Calibration Curve Analysis.** For calibration curve analysis, standards (10 levels) were analyzed at the beginning and end of each analytical method, with the first set of standards run in ascending order, and the latter in descending order. Calibrators were calculated by the analysis of the peak area of the target drug divided by the peak area of the internal standard to yield a peak area ratio. Calibration curve analysis was assessed from the  $r^2$  of a  $1/x^2$  weighted quadratic regression analysis for both rifapentine and its metabolite, which provided the best fit for the 3-log dynamic range of this assay. Calibration curve analysis was assessed by the analysis of three calibration curves in either plasma or whole blood as dried blood spots. Each standard curve was evaluated by duplicate analyses of matrix-specific calibrators.

**Stability Challenges.** QC levels prepared in plasma and whole blood as dried blood spots were challenged under a variety of conditions to assess stability. Sample matrix stability was assessed by incubating plasma or whole blood as a dried blood spot at room temperature and unprotected from light for 24 h-72 h. Injection matrix stability was tested by leaving extracted samples at 4-7°C for 72 h or 120 h for whole blood as dried blood spots or plasma, respectively. Additionally, whole blood controls as dried blood spots were tested at high heat (45°C) and 100% humidity to mimic real world conditions. Alternatively, plasma samples were subjected to 3 freeze-thaw cycles at -80°C. Stability was determined by comparing stability-challenges QC samples to specimens freshly prepared or extracted. In all cases, stability was analyzed through the determination of a percent difference (% difference), which is calculated as the difference between challenged and unchallenged samples divided by unchallenged sample concentrations, and multiplied by 100. Specimens were considered stable if the % difference was  $\leq 15\%$  from unchallenged samples.

**Matrix Effect Characterization.** Matrix effects, extraction efficiency and processing efficiency were assessed following the approach described by Matuszewski and colleagues to quantitatively assess the impact of matrix interferences on ion suppression or enhancement (1). A quantitative assessment of matrix effects, as well as extraction and overall processing efficiency, was performed by preparing low, mid and high QC levels across 6 independent plasma or whole blood lots. Three sets of conditions were tested. An un-extracted set was prepared by spiking rifapentine, desacetyl-rifapentine and isotopically-labeled internal standard into 500 ml of acetonitrile with 0.5 mg/ml ascorbic acid and 500 ml of 5mM ammonium formate with 0.5

mg/ml ascorbic acid for plasma and 450  $\mu$ L of extraction solvent (90:10 methanol: 50mM ammonium formate buffer with 0.50 mg/mL ascorbic acid) for whole blood as dried blood spots, to achieve final concentrations of 150, 2,500 and 70,000 ng/ml. Following extraction of multiple lots of plasma or whole blood as dried blood spots was performed as previously described, post-extracted samples were spiked with stock solutions of rifapentine and its metabolite, as well as the internal standard. A pre-extracted set was analyzed by processing QC levels prepared in plasma or whole blood as dried blood spots as previously described. Raw peak area for rifapentine, desacetyl-rifapentine and its internal standard were observed and peak area ratios of each analyte of interest were determined to assess matrix effects (post-extracted samples compared to un-extracted samples, multiplied by 100), extraction efficiency (pre-extracted samples compared to post-extracted samples, multiplied by 100) and overall processing efficiency (pre-extracted samples compared to un-extracted samples, multiplied by 100).

**Supplemental Table A1.** UPLC schematic for detection of rifapentine and desacetyl-rifapentine in human heparinized plasma and whole blood as dried blood spots.

| Step | Start Time (min) | Flow (ml/min) | %A <sup>a</sup> | %B <sup>b</sup> |
|------|------------------|---------------|-----------------|-----------------|
| 1    | 0.00             | 0.3           | 80              | 20              |
| 2    | 1.50             | 0.3           | 1.0             | 99              |
| 3    | 3.50             | 1.0           | 1.0             | 99              |
| 4    | 4.00             | 0.3           | 80              | 20              |

<sup>a</sup> 5mM ammonium formate

<sup>b</sup> 3% DMSO in acetonitrile

**Supplemental Table A2.** Extraction conditions attempted for RPT, desRPT and the deuterated internal standard d3-rifampin from whole blood as DBS on Whatman 903 Protein Saver Cards and Whatman FTA DMPK-C Cards.

| Extraction Solvent                                | RPT               | desRPT | d3-RIF | RPT          | desRPT | d3-RIF |
|---------------------------------------------------|-------------------|--------|--------|--------------|--------|--------|
|                                                   | % Recovery        |        |        | % Recovery   |        |        |
|                                                   | Whatman 903 Paper |        |        | DMPK-C Paper |        |        |
| 70:30 ACN:H <sub>2</sub> O                        | 79                | 87     | 89     | 58           | 66     | 73     |
| 50:50 ACN:H <sub>2</sub> O                        | 75                | 68     | 86     | 58           | 53     | 73     |
| 50:50 ACN:H <sub>2</sub> O with 0.1% Formic Acid  | 46                | 26     | 35     | 47           | 23     | 27     |
| 90:10 ACN:5mM Ammonium formate                    | 55                | 69     | 86     | 40           | 56     | 70     |
| 50:50 MeOH:H <sub>2</sub> O                       | 77                | 86     | 105    | 55           | 70     | 81     |
| 50:50 MeOH:H <sub>2</sub> O with 0.1% Formic Acid | 53                | 35     | 55     | 44           | 37     | 47     |
| 90:10 MeOH:5mM Ammonium formate                   | 77                | 73     | 100    | 51           | 72     | 65     |

**Supplemental Table A3.** Punch sizes attempted for RPT, desRPT and the deuterated internal standard d3-rifampin from whole blood as DBS on Whatman 903 Protein Saver Cards and Whatman FTA DMPK-C Cards.

| Punch Size and Paper | RPT                | desRPT             | d3-RIF             |
|----------------------|--------------------|--------------------|--------------------|
|                      | Peak Area (counts) | Peak Area (counts) | Peak Area (counts) |
| 3mm DMPK-C           | 2576               | 274                | 18075              |
| 3mm Whatman 903      | 1700               | 457                | 17204              |
| 1/8in DMPK-C         | 1441               | 254                | 17110              |
| 1/8in Whatman 903    | 1552               | 109                | 15574              |
| 6mm DMPK-C           | 4583               | 675                | 16574              |
| 6mm Whatman 903      | 4213               | 647                | 15623              |

## REFERENCES

1. **Matuszewski, B. K., M. L. Constanzer, and C. M. Chavez-Eng.** 1998. Matrix effect in quantitative LC/MS/MS analyses of biological fluids: a method for determination of finasteride in human plasma at picogram per milliliter concentrations. *Anal. Chem.* **70**:882-889.
